# Supplementary material for: Feasibility and clinical impact of out-of-ICU noninvasive respiratory support in patients with COVID-19-related pneumonia
Source: PubMed Central journal article supplement — Eur Respir J. 2020 Nov 5;56(5):2002130. doi: 10.1183/13993003.02130-2020 (PMC7397952; doi:10.1183/13993003.02130-2020), 2020-11-05
Supplement: ERJ-02130-2020.Shareable.pdf [file ERJ-02130-2020.Shareable.pdf]

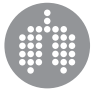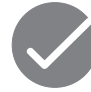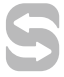

SHAREABLE PDF

# Feasibility and clinical impact of out-of-ICU noninvasive respiratory support in patients with COVID-19-related pneumonia

Cosimo Franco<sup>1,16</sup>, Nicola Facciolongo<sup>2,16</sup>, Roberto Tonelli<sup>3,4</sup>, Roberto Dongilli<sup>5</sup>, Andrea Vianello<sup>6</sup>, Lara Pisani<sup>7</sup>, Raffaele Scala<sup>8</sup>, Mario Malerba<sup>9</sup>, Annalisa Carlucci<sup>10</sup>, Emanuele Alberto Negri<sup>2</sup>, Greta Spoladore<sup>11</sup>, Giovanna Arcaro<sup>6</sup>, Paolo Amedeo Tillio<sup>9</sup>, Cinzia Lastoria<sup>12</sup>, Gioachino Schifino<sup>7</sup>, Luca Tabbi<sup>4</sup>, Luca Guidelli<sup>8</sup>, Giovanni Guaraldi<sup>13</sup>, V. Marco Ranieri<sup>14</sup>, Enrico Clini<sup>4,17</sup> and Stefano Nava<sup>15,17</sup>

**Affiliations:** <sup>1</sup>Respiratory Intensive Care Unit – AUSL, Piacenza, Italy. <sup>2</sup>Respiratory Unit AUSL Reggio Emilia, IRCCS di Reggio Emilia, Modena, Italy. <sup>3</sup>Clinical and Experimental Medicine PhD Programme, University of Modena Reggio Emilia, Modena, Italy. <sup>4</sup>University Hospital of Modena, Respiratory Diseases Unit, Dept of Medical and Surgical Sciences SMECHIMAI, University of Modena Reggio Emilia, Modena, Italy. <sup>5</sup>Division of Respiratory Diseases with Intermediate Respiratory Intensive Care Units, Central Hospital of Bolzano, Bolzano, Italy. <sup>6</sup>Respiratory Pathophysiology Division University of Padova, Padova, Italy. <sup>7</sup>Respiratory and Critical Care Unit, Sant'Orsola Hospital, Bologna Dept of Specialist, Diagnostic, and Experimental Medicine, School of Medicine, University di Bologna, Bologna, Italy. <sup>8</sup>Pulmonology and Respiratory Intensive Care Unit, S. Donato Hospital, Arezzo, Italy. <sup>9</sup>Dept of Translational Medicine, Università Piemonte Orientale, Respiratory Unit, Ospedale S. Andrea, Vercelli, Italy. <sup>10</sup>Dipartimento di Medicina e Chirurgia, Università Insubria Varese-Como, ICS Maugeri, Pavia, Italy. <sup>11</sup>Division of Infectious Diseases, Central Hospital of Bolzano, Bolzano, Italy. <sup>12</sup>Respiratory Rehabilitation Unit, ICS Maugeri, Pavia, Italy. <sup>13</sup>Infectious Diseases Unit, University Hospital of Modena Policlinico. University of Modena Reggio Emilia, Modena, Italy. <sup>14</sup>Alma Mater Studiorum – Università di Bologna, Dipartimento di Scienze Mediche e Chirurgiche, Anesthesia and Intensive Care Medicine, Policlinico di Sant'Orsola, Bologna, Italy. <sup>15</sup>Alma Mater Studiorum – Università di Bologna, Dipartimento di Scienze Mediche e Chirurgiche, Infectious Diseases Unit, Sant'Orsola-Malpighi Hospital, University of Bologna, Bologna, Italy. <sup>16</sup>Contributed equally to the work and should both be considered as first author. <sup>17</sup>Contributed equally to the work and should both be considered as senior author.

**Correspondence:** Stefano Nava, University Hospital of Bologna, Respiratory Diseases and Respiratory Intensive Care Unit, Via Massarenti 9, 401138 Bologna, Italy. E-mail: stefanava@gmail.com

@ERSpublications

**In patients with SARS-CoV-2 infection and acute respiratory failure, this study demonstrates that the utilisation of noninvasive respiratory support delivered outside the ICU was feasible and effective, but associated with a risk of staff contamination** <https://bit.ly/33mrJTU>

**Cite this article as:** Franco C, Facciolongo N, Tonelli R, *et al.* Feasibility and clinical impact of out-of-ICU noninvasive respiratory support in patients with COVID-19-related pneumonia. *Eur Respir J* 2020; 56: 2002130 [<https://doi.org/10.1183/13993003.02130-2020>].

This single-page version can be shared freely online.

## ABSTRACT

**Introduction:** The severe acute respiratory syndrome-coronavirus 2 outbreak spread rapidly in Italy and the lack of intensive care unit (ICU) beds soon became evident, forcing the application of noninvasive respiratory support (NRS) outside the ICU, raising concerns over staff contamination. We aimed to analyse the safety of the hospital staff and the feasibility and outcomes of NRS applied to patients outside

the ICU.

**Methods:** In this observational study, data from 670 consecutive patients with confirmed coronavirus disease 2019 referred to pulmonology units in nine hospitals between March 1 and May 10, 2020 were analysed. Data collected included medication, mode and usage of NRS (*i.e.* high-flow nasal cannula (HFNC), continuous positive airway pressure (CPAP), noninvasive ventilation (NIV)), length of stay in hospital, endotracheal intubation (ETI) and deaths.

**Results:** 42 (11.1%) healthcare workers tested positive for infection, but only three of them required hospitalisation. Data are reported for all patients (69.3% male), whose mean $\pm$ SD age was 68 $\pm$ 13 years. The arterial oxygen tension/inspiratory oxygen fraction ratio at baseline was 152 $\pm$ 79, and the majority (49.3%) of patients were treated with CPAP. The overall unadjusted 30-day mortality rate was 26.9%, with 16%, 30% and 30% for HFNC, CPAP and NIV, respectively, while the total ETI rate was 27%, with 29%, 25% and 28%, respectively; the relative probability of death was not related to the NRS used after adjustment for confounders. ETI and length of stay were not different among the groups. Mortality rate increased with age and comorbidity class progression.

**Conclusions:** The application of NRS outside the ICU is feasible and associated with favourable outcomes. Nonetheless, it was associated with a risk of staff contamination.
