# Supplementary material for: Feasibility and clinical impact of out-of-ICU noninvasive respiratory support in patients with COVID-19-related pneumonia
Source: PubMed Central journal article supplement — Eur Respir J. 2020 Nov 5;56(5):2002130. doi: 10.1183/13993003.02130-2020 (PMC7397952; doi:10.1183/13993003.02130-2020), 2020-11-05
Supplement: ERJ-02130-2020.Table.pdf [file ERJ-02130-2020.Table.pdf]

**Table S1**

| <b>Support</b>                              | <b>Value</b> |
|---------------------------------------------|--------------|
| <b>CPAP</b>                                 |              |
| PEEP, cmH <sub>2</sub> O (SD)*              | 10.2 (1.6)   |
| Interface\$                                 |              |
| <i>Helmet, n (%)</i>                        | 149 (99)     |
| <i>Facemask, n (%)</i>                      | 2 (1.3)      |
| <b>NIV</b>                                  |              |
| PEEP, cmH <sub>2</sub> O (SD) §             | 9.5 (2.2)    |
| Pressure support, cmH <sub>2</sub> O (SD) ^ | 17.3 (3)     |
| Interface°                                  |              |
| <i>Helmet, n (%)</i>                        | 15 (20.8)    |
| <i>Facemask, n (%)</i>                      | 57 (79.2)    |
| <b>HFNC</b>                                 |              |
| Flow, L/min (SD) &                          | 50.5 (8)     |

Setting parameters according to support. The data are presented as a numerical and percentage value and as mean and standard deviation (SD) for continuous variables.

*HFNC = High Flow Nasal Cannula; CPAP = Continuous Positive Airways Pressure; NIV = Non-Invasive mechanical Ventilation*

*\*n=66, \$n=151, §n=82, ^n=87, °n=72, &n=48*
